# Supplementary material for: Caenorhabditis elegans N-glycan Core β-galactoside Confers Sensitivity towards Nematotoxic Fungal Galectin CGL2
Source: PLoS Pathog. 2010 Jan 8;6(1):e1000717. doi: 10.1371/journal.ppat.1000717 (PMC2798750; doi:10.1371/journal.ppat.1000717)
Supplement: Table S1 — Statistics on CGL2-TAMRA staining (Fig. 6). Animals were scored for specific staining of the intestinal epithelium. (0.01 MB PDF) [file ppat.1000717.s002.pdf]

### Supporting Information: Supplementary Table S1

**Table S1. Statistics on CGL2-TAMRA staining (Fig. 6).** Animals were scored for specific staining of the intestinal epithelium.

| <i>Strain</i>                   | <i># of animals scored</i> | <i># of animals stained</i> | <i># of animals not stained</i> | <i>Fraction of animals stained</i> |
|---------------------------------|----------------------------|-----------------------------|---------------------------------|------------------------------------|
| <i>pmk-1(km25)</i>              | 32                         | 31                          | 1                               | 0.97                               |
| <i>fut-8(op498);pmk-1(km25)</i> | 25                         | 4                           | 21                              | 0.16                               |
